# Supplementary material for: Probing the nanoparticle–AGO2 interaction for enhanced gene knockdown
Source: Royal Society of Chemistry journal article supplement (doi:10.1039/c8sm00534f), 2018-01-01
Supplement: c8sm00534f1.pdf [file c8sm00534f1.pdf]

# Probing the nanoparticles-Ago2 interaction for enhanced gene knockdown

Sonal Deshpande<sup>1</sup> and Neetu Singh<sup>1,2\*</sup>

<sup>1</sup>Centre for Biomedical Engineering, Indian Institute of Technology-Delhi, Hauz Khas, New Delhi-110016, India.

<sup>2</sup>Biomedical Engineering Unit, All India Institute of Medical Sciences, Ansari Nagar, New Delhi-110029, India.

## Supplementary Information

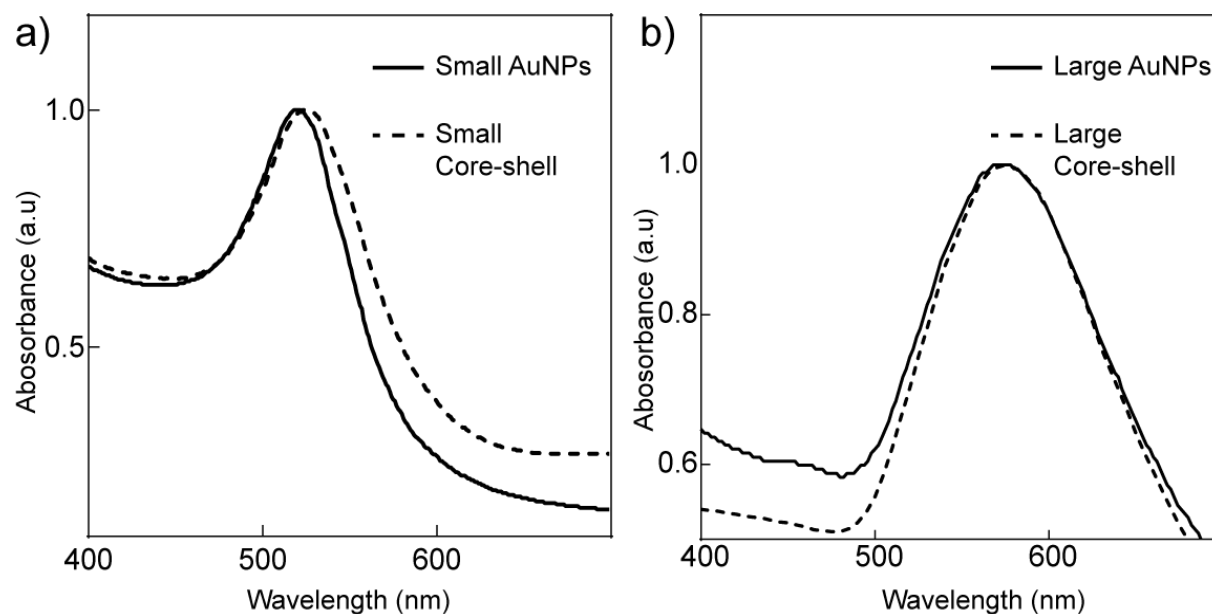

**Figure S1: Absorbance spectra of AuNPs, before and after shell synthesis.**

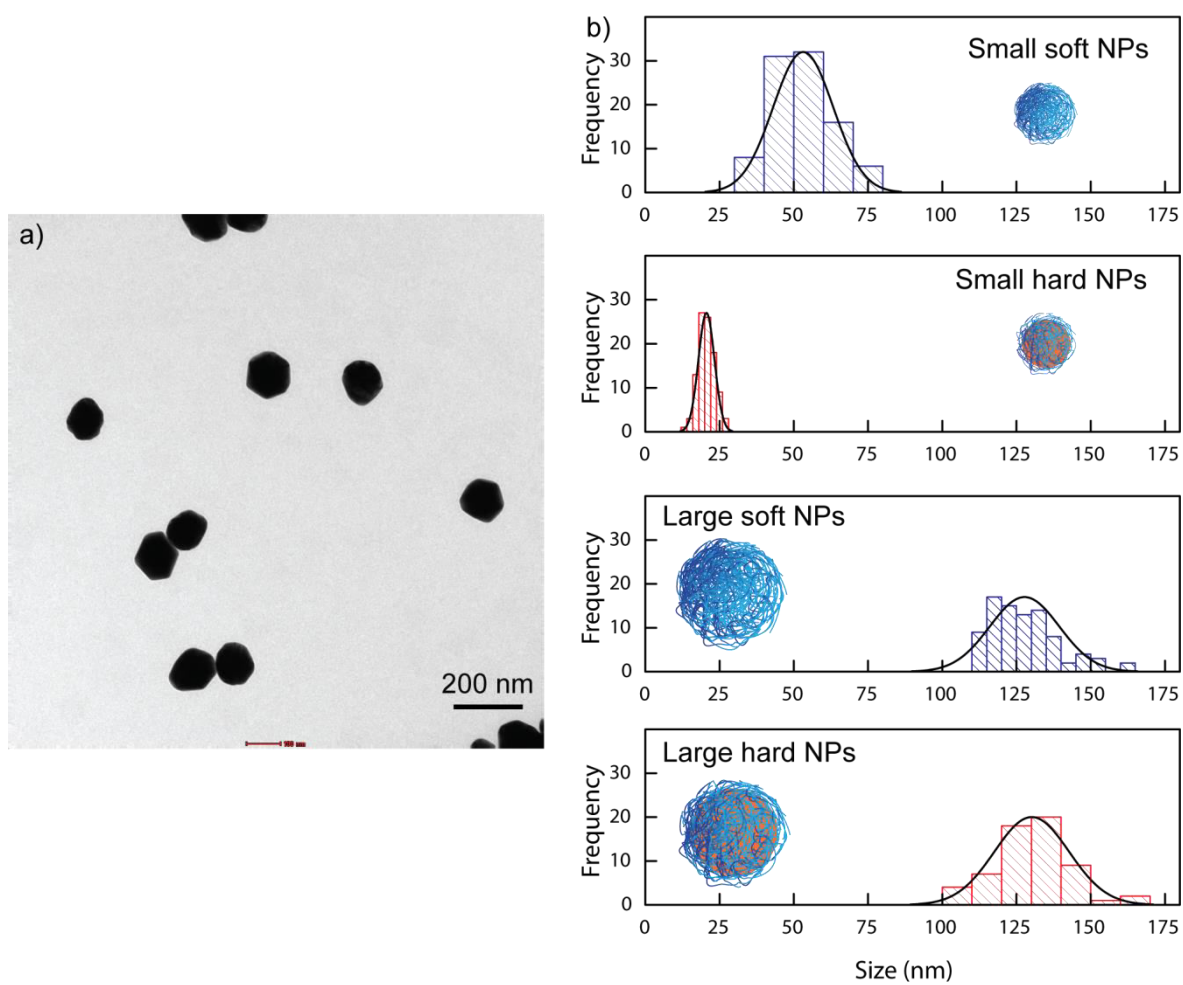

**Figure S2.** a) TEM micrograph of  $\text{Hard}_{\text{Large}}$  nanoparticles. b) Size distribution of nanoparticles by TEM micrograph analysis. At least 60 nanoparticles were used for analysis.

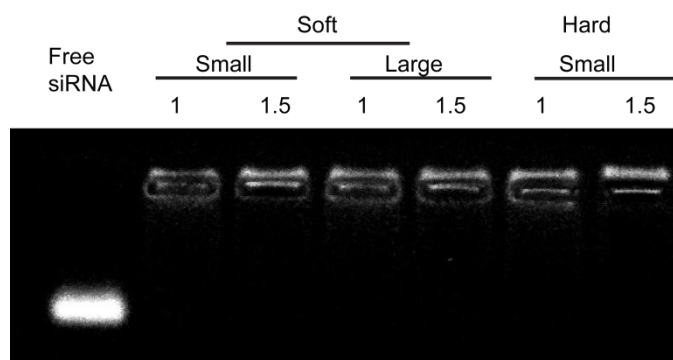

**Figure S3.** Optimization of siRNA loading in the nanoparticles by agarose gel electrophoresis

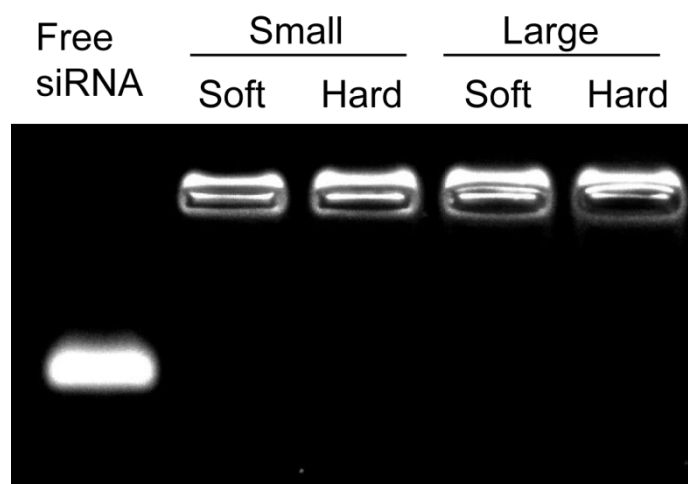

**Figure S4:** Loading of siRNA in the nanoparticles

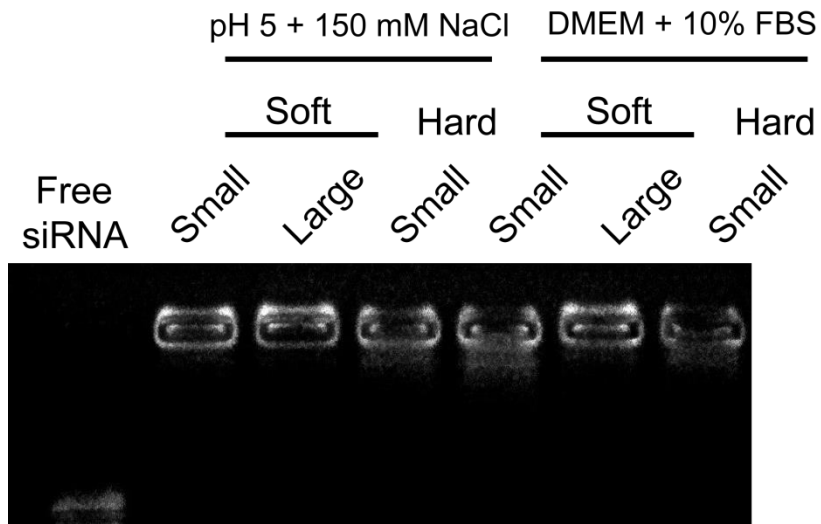

**Figure S5.** Electrophoretic mobility assay stability of siRNA in FBS supplemented media and at higher ionic strength and low pH.

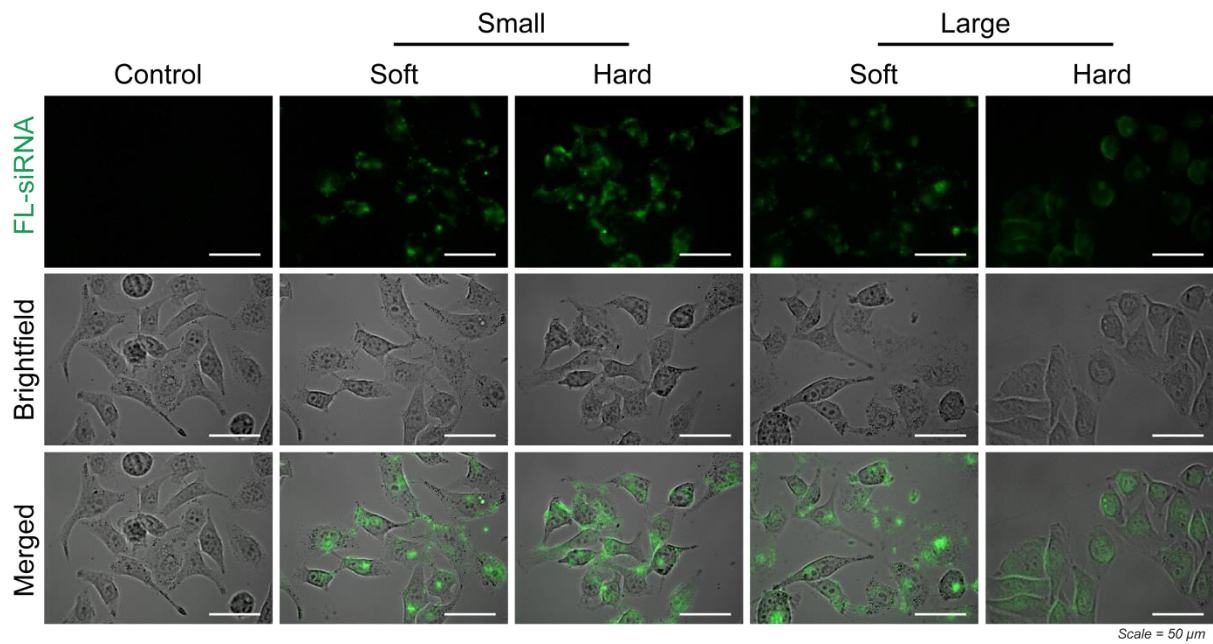

**Figure S6:** Uptake of FL-siRNA loaded nanoparticles by HeLa cells by fluorescence microscopy.

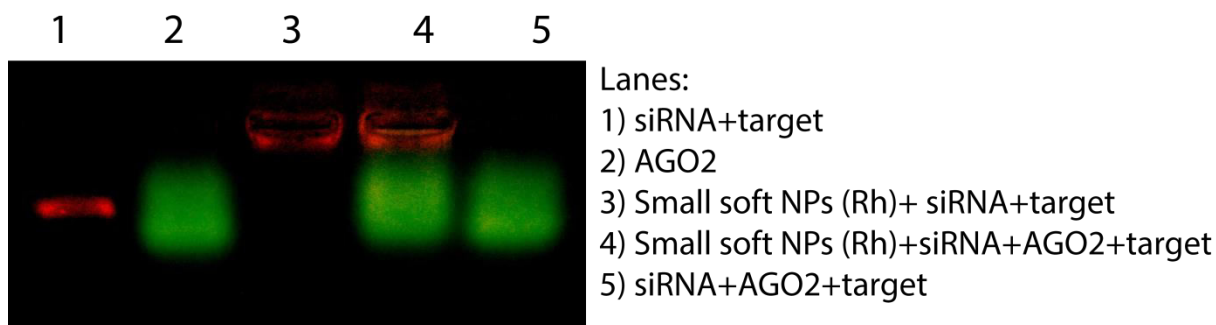

**Figure S7.** Colocalization of rhodamine (Rh) tagged small nanogel and fluorescein labelled AGO2 in presence of siRNA and target, by electrophoretic mobility assay.

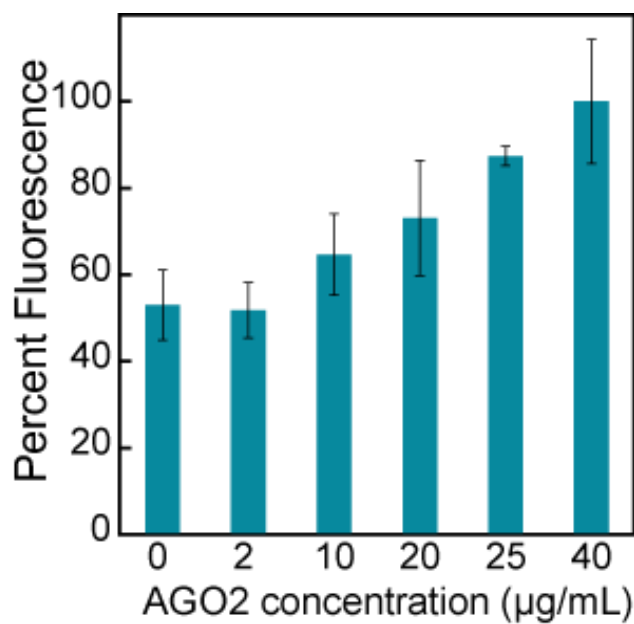

**Figure S8.** Assay showing AGO2 concentration depended increase in fluorescence in AGO2-siRNA interaction study.

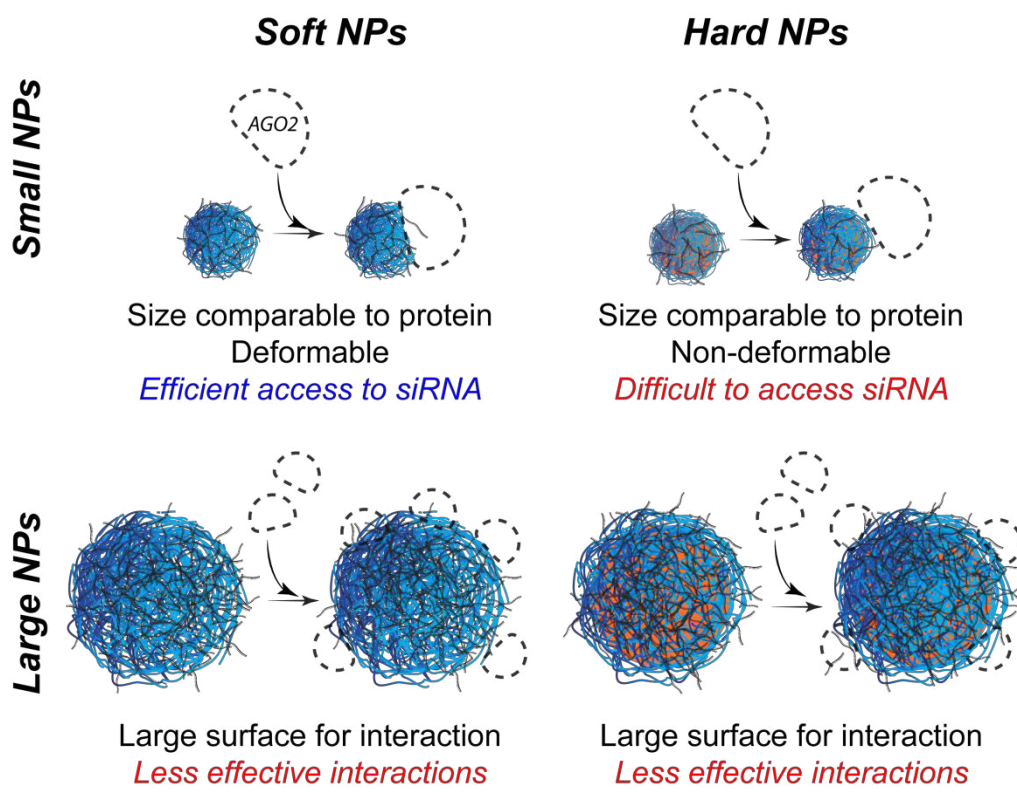

**Figure S9.** Schematic representation of the hypothesis for interaction of nanoparticles of different size and softness
